# Supplementary material
Source: PubMed Central journal article supplement (PMC4049097)
Supplement: NIHMS594393-supplement-2.pdf [file NIHMS594393-supplement-2.pdf]

## Supplemental data for

Bastiaansen *et al*, “The lysine acetyltransferase PCAF is a key regulator of arteriogenesis”

### ***Table of Content***

|                               |   |
|-------------------------------|---|
| Supplemental Figure I.....    | 2 |
| Supplemental Figure II .....  | 3 |
| Supplemental Figure III ..... | 4 |
| Supplemental Table I .....    | 6 |
| Supplemental Table II .....   | 7 |

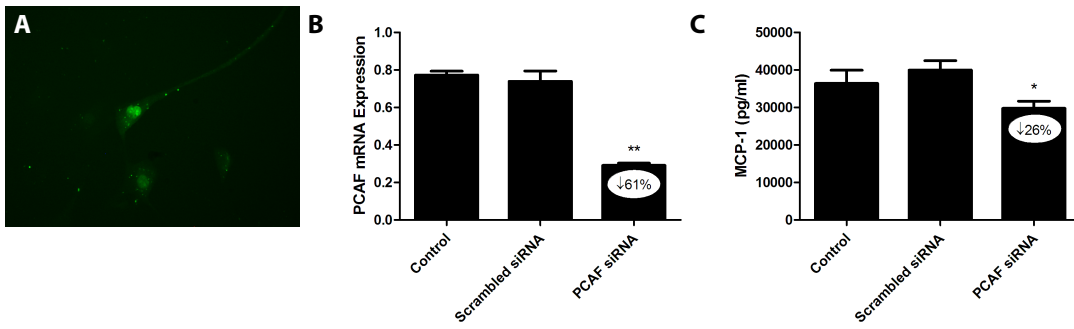

Supplemental Figure I. PCAF knockdown by siRNA in vascular smooth muscle cells. (A) Vascular smooth muscle cells (VSMCs) were transfected with non-target fluorescent siGlow (Dharmacon) to test transfection efficiency, using Lipofectamine 2000 according to the manufacturer's instructions. VSMCs were visualized on a Leica fluorescence microscope. (B) VSMCs were plated and transfected with control short-interfering RNA (siRNA) or a combination of 4 siRNAs directed towards PCAF for 4 hours. Untransfected VSMCs were used as control. VSMCs were incubated with LPS (1 ng/ml) for 24 hours. To confirm PCAF knockdown, PCAF mRNA was measured by real-time quantitative PCR. Levels were normalized against the expression of HPRT1. PCAF specific siRNA reduced PCAF expression with 61% in comparison to scrambled siRNA. (C) Cell-free supernatant of LPS stimulated VSMCs was collected for MCP-1 quantification, measured by ELISA. Transfection with PCAF specific siRNA inhibited MCP-1 production of VSMCs in comparison to scrambled siRNA. All samples were performed in triplicates. \*P < .05, \*\*P < .01, scrambled siRNA versus PCAF siRNA.

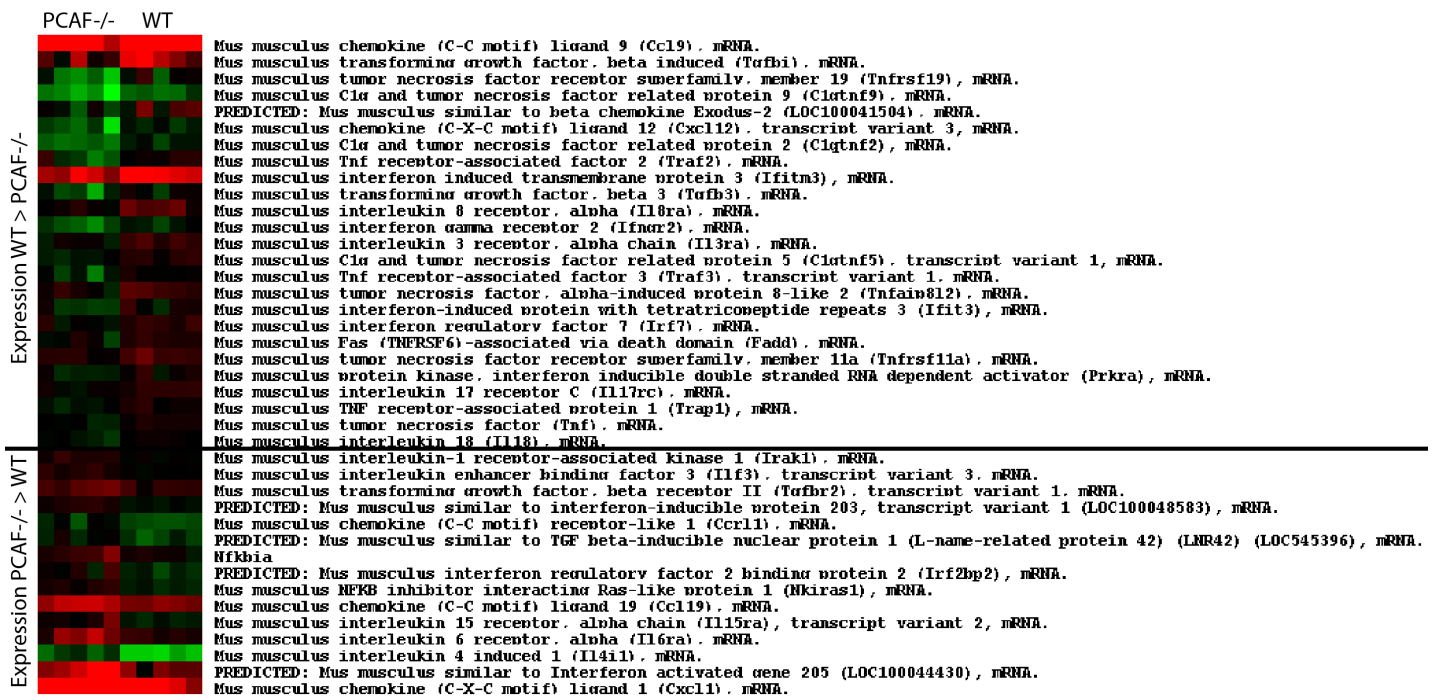

Supplemental Figure II. Differential inflammatory gene expression in PCAFA<sup>-/-</sup> and WT mice. Heatmap of differentially expressed inflammatory genes in adductor muscle group of PCAFA<sup>-/-</sup> and WT mice, 1 day after HLI. Gene definitions containing any of these criteria (interleukin, chemokine, interferon, TGF, TNF, NFKB) were selected. Included are genes that were significantly different between PCAFA<sup>-/-</sup> and WT mice (q-value < 5). Data are presented as the fold change in expression between day 1 and average preoperative baseline levels, generating t1/t0avg ratios. Red indicates increased and green indicates reduced expression relative to average baseline levels.

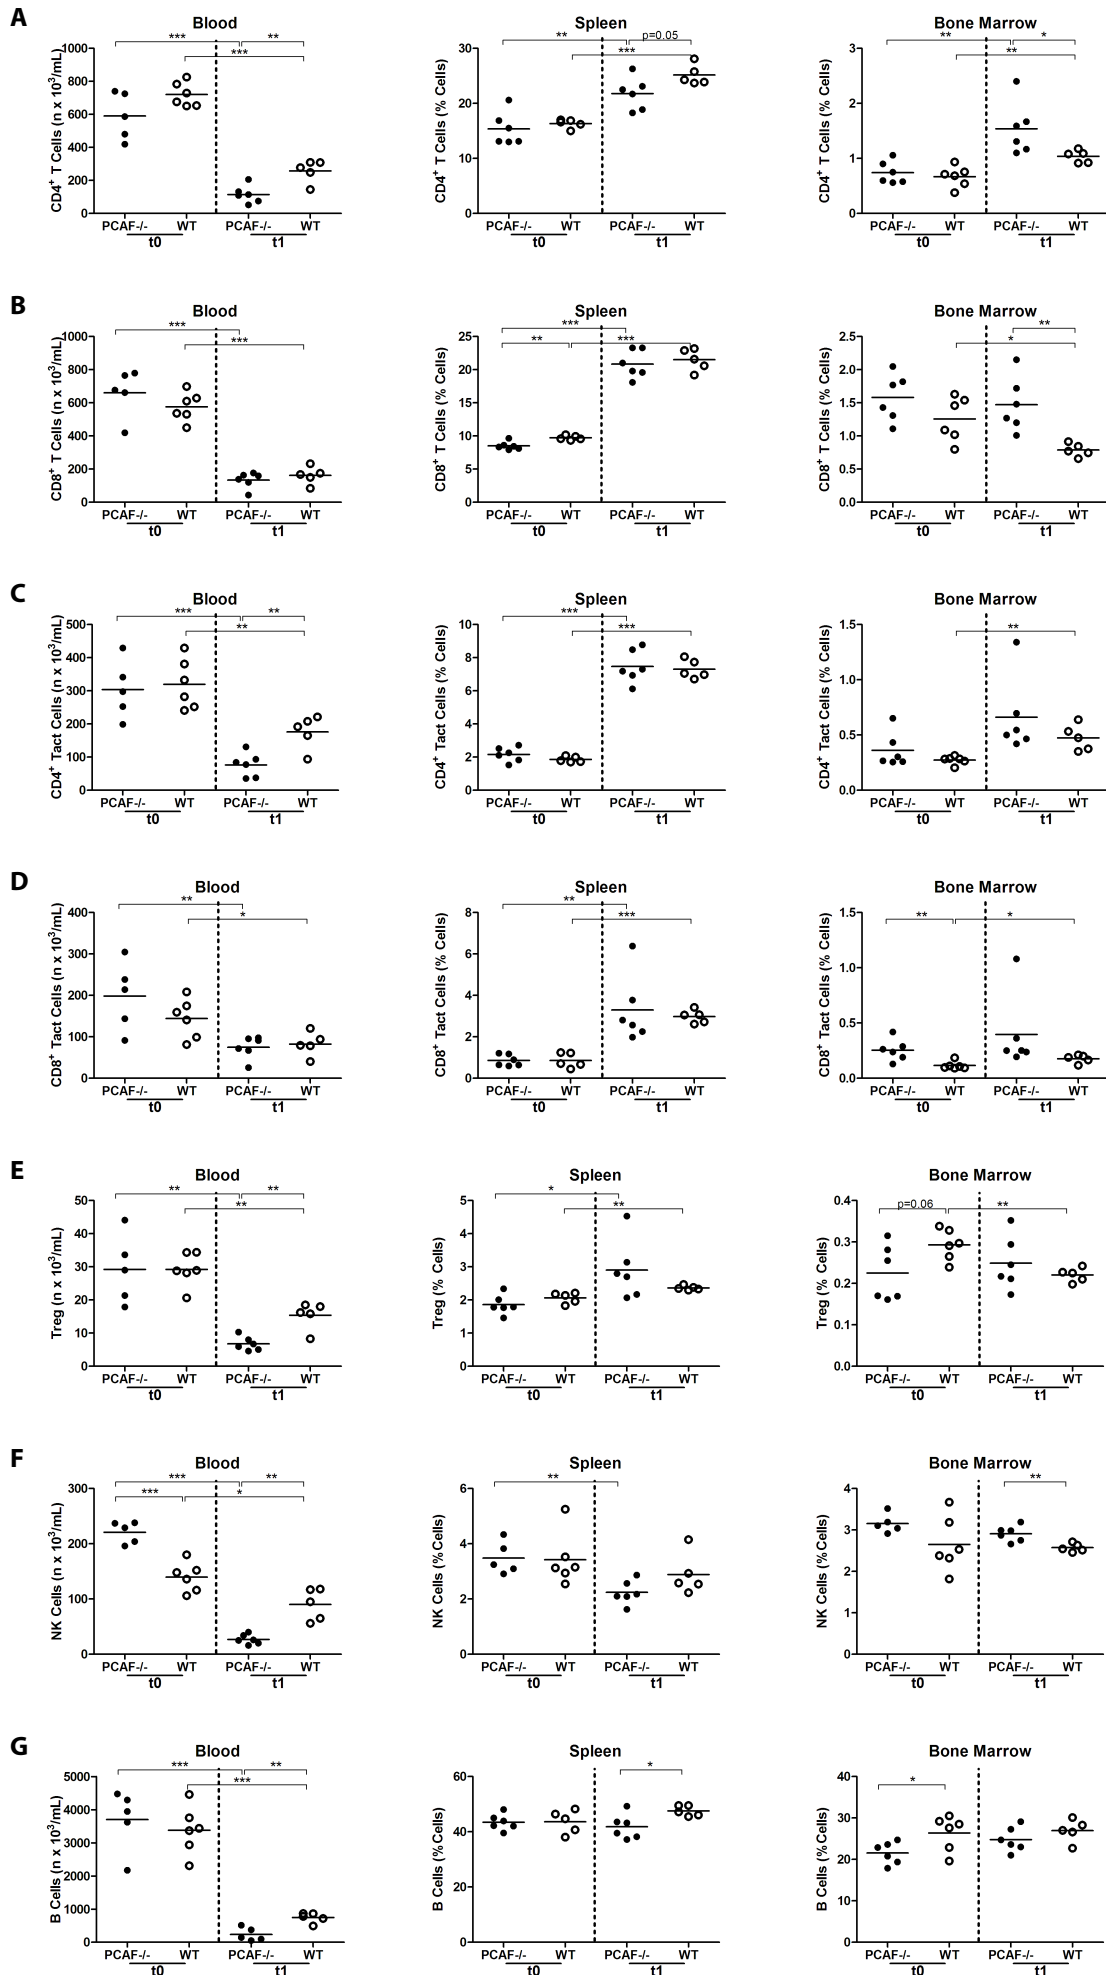

**H**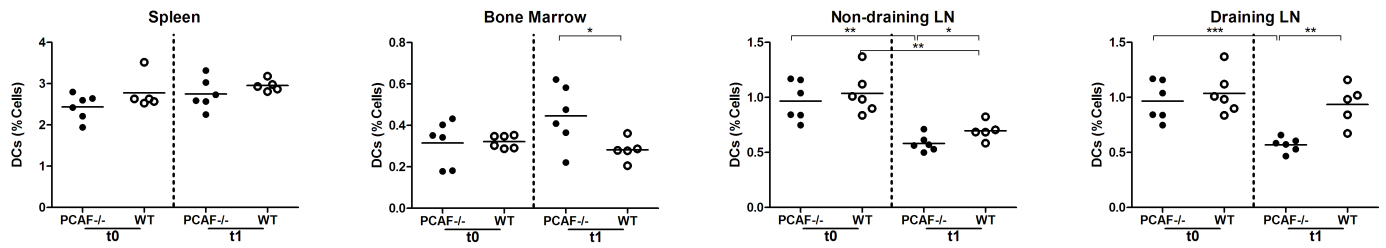**I**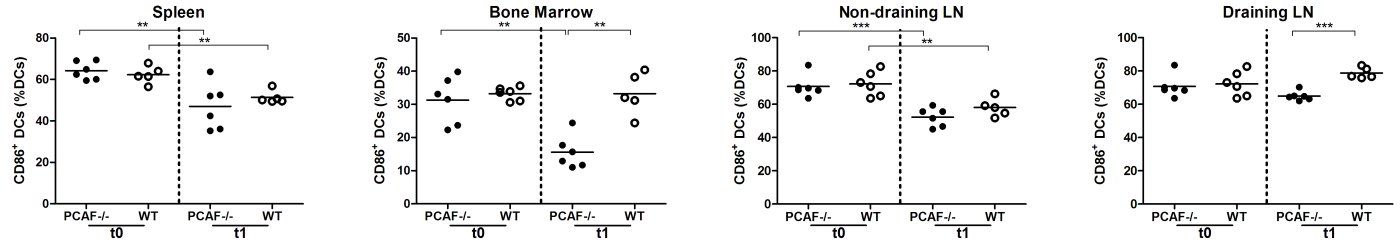

Supplemental Figure III. Leukocyte subtypes in PCAF<sup>-/-</sup> and WT mice after HLI. Flow cytometry analysis of lymphocytes in blood (nx103/mL), spleen and bone marrow (% of total cells). In succession, values are presented for (A) CD4<sup>+</sup> T helper cells, (B) CD8<sup>+</sup> cytotoxic T cells, (C) activated CD4<sup>+</sup> T helper cells, (D) activated CD8<sup>+</sup> cytotoxic T cells, (E) regulatory T cells (Treg), (F) Natural Killer (NK) cells and (G) B lymphocytes. (H) Dendritic cells (DCs) in spleen, bone marrow, non-draining and draining (inguinal) lymph nodes (LN). (I) Activated DCs in spleen, bone marrow, non-draining and draining (inguinal) lymph nodes.

| Symbol       | Gene Name                                                                   | PCAF <sup>-/-</sup> | WT    | Ratio<br>PCAF <sup>-/-</sup> vs WT |      |
|--------------|-----------------------------------------------------------------------------|---------------------|-------|------------------------------------|------|
|              |                                                                             | logFC               | logFC | q-value                            | FC   |
| Arg1         | arginase 1, liver                                                           | 1.55                | 3.11  | 4.39                               | 0.34 |
| Pdk4         | pyruvate dehydrogenase kinase, isoenzyme 4                                  | 0.17                | 1.29  | 3.00                               | 0.46 |
| Ptpn6        | protein tyrosine phosphatase, non-receptor type 6,<br>transcript variant 2  | 0.55                | 1.54  | 0.86                               | 0.50 |
| Lst1         |                                                                             | 0.37                | 1.36  | 0.86                               | 0.50 |
| Anxa2        | annexin A2 (Anxa2), mRNA.                                                   | 0.39                | 1.37  | 0.69                               | 0.51 |
| Serpinb1a    | serine (or cysteine) peptidase inhibitor, clade B, member 1a                | 0.31                | 1.28  | 1.23                               | 0.51 |
| Slfn1        | schlafen 1                                                                  | 0.79                | 1.74  | 1.66                               | 0.52 |
| Mmp9         | matrix metalloproteinase 9                                                  | 0.07                | 1.01  | 0.69                               | 0.52 |
| Cotl1        | coactosin-like 1                                                            | 0.66                | 1.60  | 1.23                               | 0.52 |
| Cd52         | CD52 antigen                                                                | 1.41                | 2.33  | 4.39                               | 0.53 |
| Tagln2       | transgelin 2                                                                | 0.23                | 1.15  | 0.86                               | 0.53 |
| Ccl9         | chemokine (C-C motif) ligand 9                                              | 1.91                | 2.81  | 3.60                               | 0.54 |
| LOC100046120 | PREDICTED: similar to clusterin                                             | 1.06                | 1.94  | 1.23                               | 0.54 |
| Angptl4      | angiopoietin-like 4                                                         | 0.43                | 1.31  | 3.60                               | 0.54 |
| Cfp          | complement factor properdin                                                 | 0.37                | 1.23  | 0.40                               | 0.55 |
| Cotl1        | coactosin-like 1                                                            | 0.42                | 1.25  | 0.59                               | 0.56 |
| Kcnab2       | potassium voltage-gated channel, shaker-related subfamily,<br>beta member 2 | 0.37                | 1.16  | 0.59                               | 0.58 |
| LOC100044439 | PREDICTED: similar to cytochrome P450 CYP4F18                               | 0.40                | 1.19  | 1.66                               | 0.58 |
| Sirpa        | signal-regulatory protein alpha                                             | 0.55                | 1.33  | 1.94                               | 0.58 |
| Fbxo32       | F-box protein 32                                                            | 0.86                | 1.63  | 4.39                               | 0.59 |
| Alox5ap      | arachidonate 5-lipoxygenase activating protein                              | 1.13                | 1.87  | 1.94                               | 0.60 |
| Arhgd1b      | Rho, GDP dissociation inhibitor (GDI) beta                                  | 0.32                | 1.04  | 1.23                               | 0.61 |
| Emilin2      | elastin microfibril interfacier 2                                           | 0.10                | 0.82  | 0.86                               | 0.61 |
| Lrrc33       | leucine rich repeat containing 33                                           | 0.42                | 1.12  | 0.86                               | 0.62 |
| Fbxl22       | F-box and leucine-rich repeat protein 22                                    | 0.26                | 0.96  | 2.42                               | 0.62 |
| Emilin2      | elastin microfibril interfacier 2                                           | 0.12                | 0.80  | 1.94                               | 0.62 |
| Cyth4        | cytohesin 4                                                                 | 0.74                | 1.41  | 4.39                               | 0.63 |
| Laptm5       | lysosomal-associated protein transmembrane 5                                | 0.92                | 1.59  | 0.98                               | 0.63 |
| Sdc3         | syndecan 3                                                                  | 0.07                | 0.73  | 0.86                               | 0.64 |
| Ly6e         | lymphocyte antigen 6 complex, locus E                                       | 0.01                | 0.66  | 0.33                               | 0.64 |
| Hdac4        | histone deacetylase 4                                                       | 0.02                | 0.66  | 0.00                               | 0.64 |
| Dok2         | docking protein 2                                                           | 0.50                | 1.14  | 1.94                               | 0.64 |
| Fcgr4        | Fc receptor, IgG, low affinity IV                                           | 1.63                | 2.26  | 3.60                               | 0.64 |
| Alox5ap      | arachidonate 5-lipoxygenase activating protein                              | 0.85                | 1.48  | 2.42                               | 0.65 |
| Cap1         | CAP, adenylate cyclase-associated protein 1                                 | 0.26                | 0.89  | 0.98                               | 0.65 |
| Tgfb1        | transforming growth factor, beta induced                                    | 0.36                | 0.99  | 3.00                               | 0.65 |
| Aif1         | allograft inflammatory factor 1                                             | 0.23                | 0.84  | 1.23                               | 0.65 |
| Mcm5         | minichromosome maintenance deficient 5, cell division cycle 46              | 0.07                | 0.68  | 0.00                               | 0.65 |
| Fes          | feline sarcoma oncogene                                                     | 0.33                | 0.95  | 0.45                               | 0.65 |
| Gnb2         | guanine nucleotide binding protein (G protein), beta 2                      | 0.07                | 0.68  | 0.00                               | 0.66 |
| Cyba         | cytochrome b-245, alpha polypeptide                                         | 0.56                | 1.17  | 1.23                               | 0.66 |
| Grn          | granulin                                                                    | 0.21                | 0.81  | 0.00                               | 0.66 |
| Fxyd5        | FXYD domain-containing ion transport regulator 5                            | 0.78                | 1.38  | 3.60                               | 0.66 |
| Cdh15        | cadherin 15                                                                 | 0.09                | 0.69  | 0.33                               | 0.66 |
| Rabgef1      | RAB guanine nucleotide exchange factor                                      | 0.24                | 0.82  | 0.45                               | 0.67 |
| Oas1g        | 2'-5' oligoadenylate synthetase 1G                                          | 0.04                | 0.62  | 0.98                               | 0.67 |
| Arrb2        | arrestin, beta 2                                                            | 0.04                | 0.62  | 0.40                               | 0.67 |
| Emp3         | epithelial membrane protein 3                                               | 0.33                | 0.90  | 3.60                               | 0.67 |
| Sh3bgrl3     | SH3 domain binding glutamic acid-rich protein-like 3                        | 0.60                | 1.16  | 1.23                               | 0.68 |
| S100a11      | S100 calcium binding protein A11                                            | 0.54                | 1.11  | 4.39                               | 0.68 |

Supplemental Table I. List of differentially expressed genes in de adductor muscle group of PCAF<sup>-/-</sup> and WT mice. Data are presented as the log fold change in expression between day 1 after HLI and average preoperative baseline levels, generating t1/t0avg ratios. Listed are the top 50 genes which showed an impaired upregulation in PCAF<sup>-/-</sup> mice compared to WT mice. Q-values less than 5% were considered significant. FC = fold change.

| Symbol       | Gene Name                                                                    | PCAF <sup>-/-</sup> | WT    | q-value |
|--------------|------------------------------------------------------------------------------|---------------------|-------|---------|
|              |                                                                              | logFC               | logFC |         |
| Ccl9         | chemokine (C-C motif) ligand 9                                               | 1.91                | 2.81  | 3.60    |
| Tgfb1        | transforming growth factor, beta induced                                     | 0.36                | 0.99  | 3.00    |
| Tnfrsf19     | tumor necrosis factor receptor superfamily, member 19                        | -0.64               | -0.04 | 1.66    |
| C1qtnf9      | C1q and tumor necrosis factor related protein 9                              | -0.95               | -0.50 | 3.00    |
| LOC100041504 | PREDICTED: similar to beta chemokine Exodus-2                                | -0.16               | 0.27  | 3.60    |
| Cxcl12       | chemokine (C-X-C motif) ligand 12, transcript variant 3                      | -0.58               | -0.16 | 3.60    |
| C1qtnf2      | C1q and tumor necrosis factor related protein 2                              | -0.57               | -0.16 | 0.00    |
| Traf2        | Tnf receptor-associated factor 2                                             | -0.28               | 0.12  | 3.60    |
| Ifitm3       | interferon induced transmembrane protein 3                                   | 1.00                | 1.39  | 2.42    |
| Tgfb3        | transforming growth factor, beta 3                                           | -0.40               | -0.02 | 4.39    |
| Il8ra        | interleukin 8 receptor, alpha                                                | 0.07                | 0.43  | 0.98    |
| Ifngr2       | interferon gamma receptor 2                                                  | -0.48               | -0.15 | 1.94    |
| Il3ra        | interleukin 3 receptor, alpha chain                                          | -0.02               | 0.30  | 0.69    |
| C1qtnf5      | C1q and tumor necrosis factor related protein 5, transcript variant 1        | -0.11               | 0.19  | 0.33    |
| Traf3        | Tnf receptor-associated factor 3, transcript variant 1                       | -0.26               | 0.04  | 4.39    |
| Tnfaip8l2    | tumor necrosis factor, alpha-induced protein 8-like 2                        | 0.07                | 0.36  | 1.94    |
| Ifit3        | interferon-induced protein with tetratricopeptide repeats 3                  | -0.23               | 0.06  | 4.39    |
| Irf7         | interferon regulatory factor 7                                               | 0.00                | 0.24  | 1.94    |
| Fadd         | Fas (TNFRSF6)-associated via death domain                                    | -0.04               | 0.19  | 4.39    |
| Tnfrsf11a    | tumor necrosis factor receptor superfamily, member 11a                       | 0.14                | 0.37  | 2.42    |
| Pkrra        | protein kinase, interferon inducible double stranded RNA dependent activator | -0.14               | 0.08  | 4.39    |
| Il17rc       | interleukin 17 receptor C                                                    | 0.01                | 0.23  | 0.98    |
| Trap1        | TNF receptor-associated protein 1                                            | -0.10               | 0.11  | 1.66    |
| Tnf          | tumor necrosis factor                                                        | -0.08               | 0.11  | 1.94    |
| Il18         | interleukin 18                                                               | -0.12               | 0.04  | 4.39    |

| Symbol       | Gene Name                                                                           | PCAF <sup>-/-</sup> | WT    | q-value |
|--------------|-------------------------------------------------------------------------------------|---------------------|-------|---------|
|              |                                                                                     | logFC               | logFC |         |
| Irak1        | interleukin-1 receptor-associated kinase 1                                          | 0.18                | 0.00  | 1.66    |
| Ilf3         | interleukin enhancer binding factor 3, transcript variant 3                         | 0.19                | 0.00  | 0.98    |
| Tgfb2        | transforming growth factor, beta receptor II, transcript variant 1                  | 0.47                | 0.24  | 3.60    |
| LOC100048583 | PREDICTED: similar to interferon-inducible protein 203, transcript variant 1        | 0.16                | -0.08 | 0.33    |
| Ccr1         | chemokine (C-C motif) receptor-like 1                                               | -0.15               | -0.42 | 3.00    |
| LOC545396    | PREDICTED: similar to TGF beta-inducible nuclear protein 1                          | -0.06               | -0.33 | 3.00    |
| Nfkbia       | nuclear factor of kappa light polypeptide gene enhancer in B-cells inhibitor, alpha | 0.36                | 0.06  | 3.60    |
| Irf2bp2      | PREDICTED: interferon regulatory factor 2 binding protein 2                         | 0.09                | -0.22 | 3.00    |
| Nkiras1      | NFKB inhibitor interacting Ras-like protein 1                                       | 0.15                | -0.17 | 0.00    |
| Ccl19        | chemokine (C-C motif) ligand 19                                                     | 1.02                | 0.68  | 0.40    |
| Il15ra       | interleukin 15 receptor, alpha chain, transcript variant 2                          | 0.20                | -0.15 | 2.42    |
| Il6ra        | interleukin 6 receptor, alpha                                                       | 0.69                | 0.21  | 1.66    |
| Il4i1        | interleukin 4 induced 1                                                             | -0.39               | -1.10 | 0.00    |
| LOC100044430 | PREDICTED: similar to Interferon activated gene 205                                 | 1.27                | 0.50  | 1.23    |
| Cxcl1        | chemokine (C-X-C motif) ligand 1                                                    | 2.93                | 1.45  | 1.66    |

Supplemental Table II. List of significantly differentially expressed inflammatory genes in de adductor muscle group of PCAF<sup>-/-</sup> and WT mice. Data are presented as the log fold change in expression between day 1 after HLI and average preoperative baseline levels, generating t1/t0avg ratios. Gene definitions containing any of these criteria (interleukin, chemokine, interferon, TGF, TNF, NFKB) were selected. Q-values less than 5% were considered significant. FC = fold change.
